# Supplementary material for: Physical Changes of Preschool Children during COVID-19 School Closures in Fujian, China
Source: MDPI journal article supplement (doi:10.3390/ijerph192013699), 2022-10-21
Supplement: s1 [file s1]

Table S1 The basic situation of investigations.

| City      | Total<br>Preschool Children * | Investigations |        |                    |
|-----------|-------------------------------|----------------|--------|--------------------|
|           |                               | Male           | Female | Total <i>n</i> (%) |
| Quanzhou  | 376256                        | 4580           | 3507   | 8087 (27.4)        |
| Fuzhou    | 282283                        | 3211           | 2877   | 6088 (20.6)        |
| Zhangzhou | 155719                        | 1726           | 1550   | 3276 (11.1)        |
| Longyan   | 141226                        | 1677           | 1381   | 3058 (10.4)        |
| Putian    | 125473                        | 1417           | 1233   | 2650 (9.0)         |
| Ningde    | 116673                        | 1302           | 1150   | 2452 (8.3)         |
| Sanming   | 89113                         | 1035           | 921    | 1951 (6.6)         |
| Nanping   | 85210                         | 1061           | 890    | 1956 (6.6)         |
| Total     | 1371953                       | 16009          | 13509  | 29518              |

\*. Data comes from Fujian Provincial Maternity and Child Information System.

Table S2. Basic characteristics of participating children evaluated in the three periods.

| Period                                     | Baseline measured time point | Last measured time point | N    | Age  |      |      |     |
|--------------------------------------------|------------------------------|--------------------------|------|------|------|------|-----|
|                                            |                              |                          |      | 3    | 4    | 5    | 6   |
| After the COVID-19 related school closures | 2019.9-11                    | 2020.9-11                | 1688 | 332  | 435  | 706  | 215 |
| The same period last year                  | 2018.9-11                    | 2019.9-11                | 4540 | 1421 | 1307 | 1143 | 669 |

Table S3. Overweight and obesity rates among preschool children of different regions in four age groups of Fujian, China.

| Age        | Children with Overweight   |                            | $\chi^2$ | <i>P</i> *   | Children with Obesity     |                           | $\chi^2$ | <i>P</i> * |
|------------|----------------------------|----------------------------|----------|--------------|---------------------------|---------------------------|----------|------------|
|            | Urban                      | Suburban                   |          |              | Urban                     | Suburban                  |          |            |
| 3~         | 239 <sub>a</sub><br>(7.5)  | 249 <sub>a</sub><br>(7.7)  | 0.143    | 0.706        | 138 <sub>a</sub><br>(4.3) | 144 <sub>a</sub><br>(4.5) | 0.088    | 0.767      |
| 4~         | 289 <sub>a</sub><br>(7.5)  | 253 <sub>a</sub><br>(7.8)  | 0.229    | 0.632        | 147 <sub>a</sub><br>(3.8) | 143 <sub>a</sub><br>(4.4) | 1.593    | 0.207      |
| 5~         | 505 <sub>b</sub><br>(11.5) | 465 <sub>b</sub><br>(11.2) | 0.191    | 0.662        | 357 <sub>b</sub><br>(8.1) | 334 <sub>b</sub><br>(8.0) | 0.021    | 0.885      |
| 6~7        | 504 <sub>c</sub><br>(14.9) | 518 <sub>b</sub><br>(12.7) | 7.904    | <b>0.005</b> | 310 <sub>b</sub><br>(9.2) | 366 <sub>b</sub><br>(9.0) | 0.111    | 0.739      |
| Total      | 1537<br>(10.4)             | 1485<br>(10.1)             | 0.600    | 0.439        | 952<br>(6.4)              | 987<br>(6.7)              | 0.997    | 0.318      |
| $\chi^2$   | 143.558                    | 73.684                     |          |              | 130.309                   | 97.401                    |          |            |
| <i>P</i> # | <b>&lt;0.001</b>           | <b>&lt;0.001</b>           |          |              | <b>&lt;0.001</b>          | <b>&lt;0.001</b>          |          |            |

\*. Comparison of overweight and obesity rates of different regions.

#. Comparison of overweight and obesity rates in four age groups.

a. b. c: The overweight or obesity proportions found significant of four age groups after applying bonferroni correction are indicated by different letters. ( $P<0.05$ ).

Table S4. Overweight and obesity rates among preschool children of different genders in four age groups of Fujian, China.

| Age        | Children with Overweight |                         |                          | $\chi^2$ | <i>P</i> *       | Children with Obesity   |                          |                        | $\chi^2$ | <i>P</i> *       |
|------------|--------------------------|-------------------------|--------------------------|----------|------------------|-------------------------|--------------------------|------------------------|----------|------------------|
|            | Male                     | Female                  | Total                    |          |                  | Male                    | Female                   | Total                  |          |                  |
| 3~         | 300 <sub>a</sub> (8.5)   | 188 <sub>a</sub> (6.5)  | 488 <sub>a</sub> (7.6)   | 9.733    | <b>0.002</b>     | 167 <sub>a</sub> (4.8)  | 115 <sub>a,b</sub> (4.0) | 282 <sub>a</sub> (4.4) | 2.412    | 0.120            |
| 4~         | 334 <sub>a</sub> (8.9)   | 208 <sub>a</sub> (6.3)  | 542 <sub>a</sub> (7.7)   | 16.553   | <b>&lt;0.001</b> | 186 <sub>a</sub> (4.9)  | 104 <sub>b</sub> (3.1)   | 290 <sub>a</sub> (4.1) | 14.414   | <b>&lt;0.001</b> |
| 5~         | 602 <sub>b</sub> (12.8)  | 368 <sub>b</sub> (9.5)  | 970 <sub>b</sub> (11.3)  | 23.436   | <b>&lt;0.001</b> | 491 <sub>b</sub> (10.5) | 200 <sub>a</sub> (5.2)   | 691 <sub>b</sub> (8.1) | 80.417   | <b>&lt;0.001</b> |
| 6~7        | 600 <sub>c</sub> (14.9)  | 422 <sub>c</sub> (12.3) | 1022 <sub>c</sub> (13.7) | 10.035   | <b>0.002</b>     | 442 <sub>b</sub> (10.9) | 234 <sub>c</sub> (6.8)   | 676 <sub>b</sub> (9.1) | 37.978   | <b>&lt;0.001</b> |
| Total      | 1836 (11.5)              | 1186 (8.8)              | 3022 (10.2)              | 57.716   | <b>&lt;0.001</b> | 1286 (8.0)              | 653 (4.8)                | 1939 (6.6)             | 122.245  | <b>&lt;0.001</b> |
| $\chi^2$   | 109.148                  | 101.428                 | 207.991                  |          |                  | 184.038                 | 56.155                   | 226.791                |          |                  |
| <i>P</i> # | <0.001                   | <0.001                  | <0.001                   |          |                  | <0.001                  | <0.001                   | <0.001                 |          |                  |

\*. Comparison of overweight and obesity rates of different sexes.

#. Comparison of overweight and obesity rates in four age groups.

a. b. c: The overweight or obesity proportions found significant of four age groups after applying bonferroni correction are indicated by different letters. (*P*<0.05).

Table S5. Baseline characteristics of physical status of participating children during the pre-pandemic period.

| Variable               | Baseline of Age 4 group |              |            |       | Baseline of Age 5 group |              |            |       | Baseline of Age 6 group |              |            |              |
|------------------------|-------------------------|--------------|------------|-------|-------------------------|--------------|------------|-------|-------------------------|--------------|------------|--------------|
|                        | (Age 3 at the time)     |              | $t/\chi^2$ | $P$   | (Age 4 at the time)     |              | $t/\chi^2$ | $P$   | (Age 5 at the time)     |              | $t/\chi^2$ | $P$          |
|                        | 2018 (n=1307)           | 2019 (n=435) |            |       | 2018 (n=1143)           | 2019 (n=706) |            |       | 2018 (n=669)            | 2019 (n=215) |            |              |
| Height, cm             | 101.09±4.48             | 100.83±4.66  | 1.020      | 0.308 | 105.70±5.87             | 106.14±4.90  | -1.757     | 0.079 | 110.12±5.16             | 109.11±6.21  | 2.157      | <b>0.032</b> |
| Weight, kg             | 16.03±2.24              | 15.88±2.02   | 1.233      | 0.218 | 17.32±2.75              | 17.58±2.82   | -1.907     | 0.057 | 18.52±2.80              | 18.74±3.86   | -0.760     | 0.448        |
| BMI                    | 15.63±1.44              | 15.58±1.30   | 0.696      | 0.487 | 15.43±1.42              | 15.53±1.63   | -1.330     | 0.184 | 15.21±1.46              | 15.60±1.89   | -2.738     | <b>0.007</b> |
| People with overweight | 175(13.4)               | 62(14.3)     | 0.709      | 0.702 | 129(11.3)               | 85(12.0)     | 2.443      | 0.295 | 62(9.3)                 | 23(10.7)     | 5.780      | 0.056        |
| People with obesity    | 59(4.5)                 | 16(3.7)      |            |       | 48(4.2)                 | 40(5.7)      |            |       | 27(4.0)                 | 17(7.9)      |            |              |
